# Supplementary material
Source: publisher figshare collection journal article supplement (https://springernature.figshare.com/ndownloader/files/23720765)
Supplement: Supplementary file 1 [file 23720765]

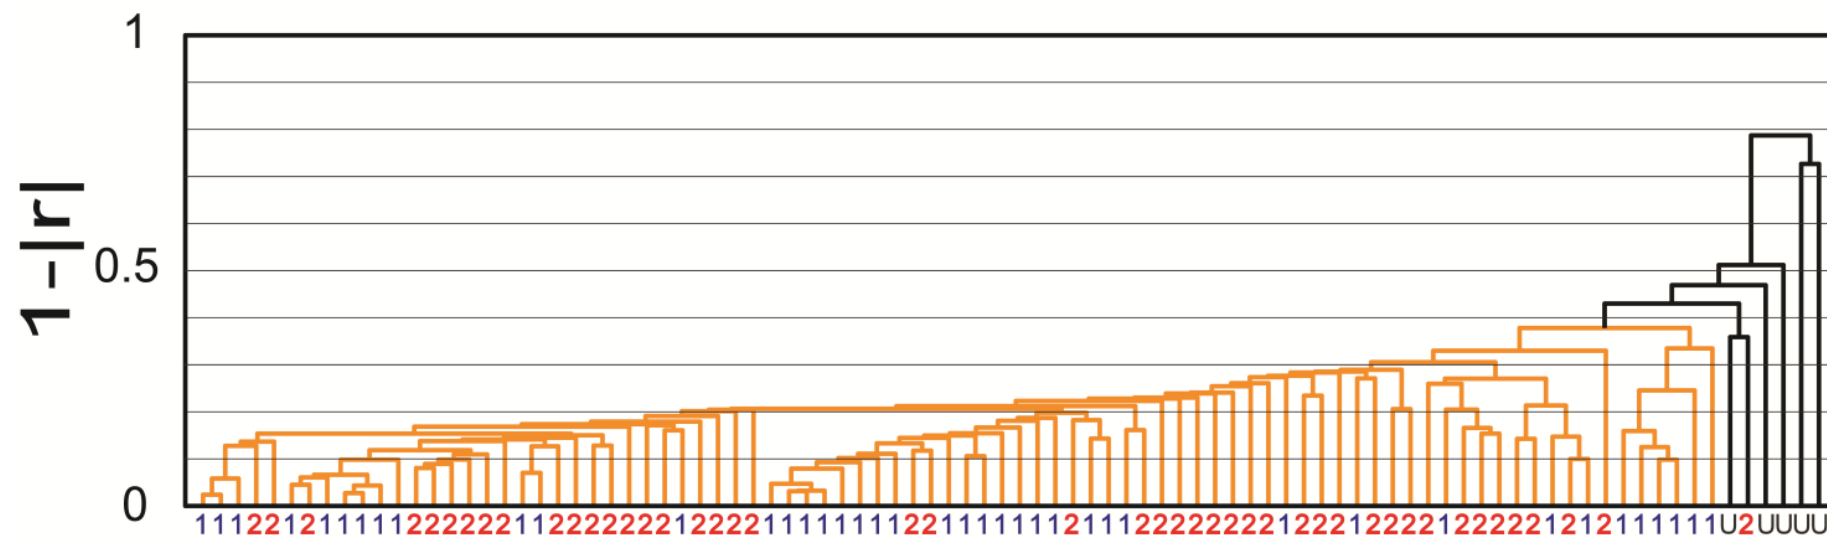

Additional file 2. A dendrogram based on the absolute value of correlation coefficient. Two families (F1 and F2) belong to a cluster (orange lines) except for one low SNR waveform, and all U events denote black lines.
